# Supplementary material for: Robot-assisted reconstructive surgery of lower urinary tract in children: a narrative review on technical aspects and current literature
Source: PubMed Central journal article supplement — Transl Pediatr. 2023 Aug 17;12(8):1540–51. doi: 10.21037/tp-22-533 (PMC10485640; doi:10.21037/tp-22-533), 2023-08-17
Supplement: tp-12-08-1540-prf.pdf [file tp-12-08-1540-prf.pdf]

## Peer Review File

**Article information:** <https://dx.doi.org/10.21037/tp-22-533>

### Reviewer Comments

**Comment 1:** This is an interesting and timely review on the robotic approach for reconstructive procedures in pediatric urology.

**Reply 1:** Thank you for the opportunity.

**Comment 2:** I suggest the authors to clearly indicate that this is a narrative review in the title and elsewhere where of this paper.

**Reply 2:**

1. Title modified as follows – “Robot-assisted reconstructive surgery of lower urinary tract in Children: A narrative review on technical aspects and current literature.” (Title page)
2. ‘narrative review’ Added in the introduction (line 25, page 1).

**Comment 3:** Please also briefly describe the literature search strategy, which is an essential part of this review.

**Reply 3:** Literature search strategy added (line 27-36, page 2).

**Comment 4:** In the introduction of the main text, the authors need to have comments on the differences and difficulties for robotic-assisted surgery in pediatric urology in comparison to adult urology and possible solutions to overcome these limitations; such background information could deepen our understanding on robot surgery in pediatric urology.

**Reply 4:** Description of differences and difficulties in robotic surgery in adult's vs pediatrics is added in the introduction (line 6-24, page 1).

**Comment 5:** In the main text of the literature review, details of the robotic surgery and methodology details such as sample size and follow up duration are also needed to be briefly described.

**Reply 5:** Added in red in Literature review (line 177-285, page 7-11)

**Comment 6:** It is also interesting and helpful to briefly analyze the limitations and unaddressed clinical questions of these studies reviewed.

**Reply 6:** Briefly analysis and critical review added (in red) in the literature review (line 177-285, page 7-11)

**Comment 7:** The summary part is not detailed enough. The authors need to have overall comments on the stage of the development of robot surgery in pediatric urology, limitations, and important clinical and technical questions to be addressed. It is also necessary to list several major challenges and suggest the possible solutions or research directions.

**Reply 7:** Summary expanded to include details / comments as requested above added. (Line 307-322, Page 12-13)
